# Supplementary material for: Physical activity enhances the improvement of body mass index and metabolism by inulin: a multicenter randomized placebo-controlled trial performed in obese individuals
Source: PubMed Central journal article supplement (PMC8966292; doi:10.1186/s12916-022-02299-z), 2022-03-30
Supplement: 12916_2022_2299_MOESM1_ESM.pdf [file 12916_2022_2299_MOESM1_ESM.pdf]

**A****Nausea**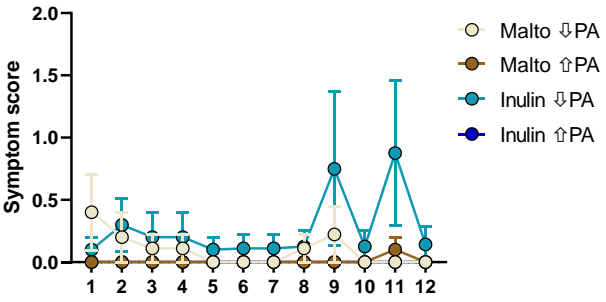**B****Reflux**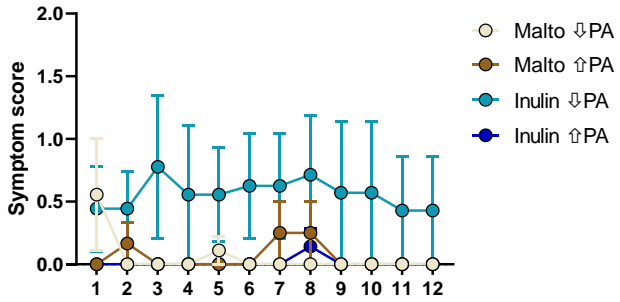**C****Rumbling**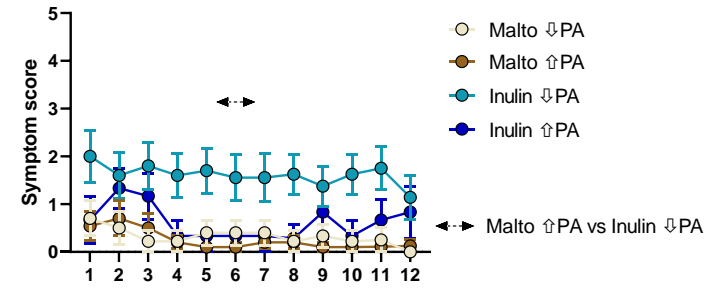**D****Cramp**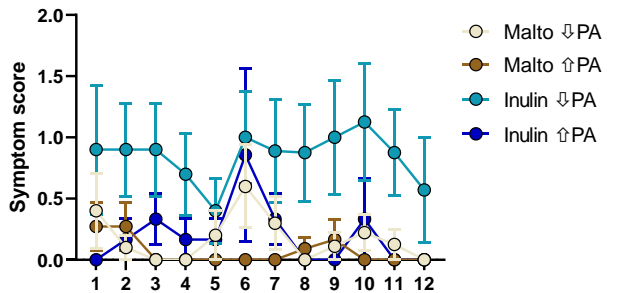**E****Flatulence**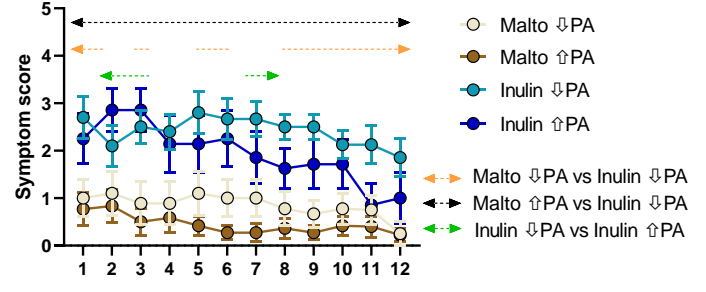**F****Bloating**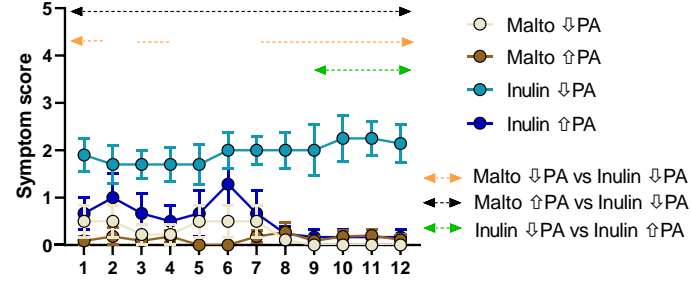**G**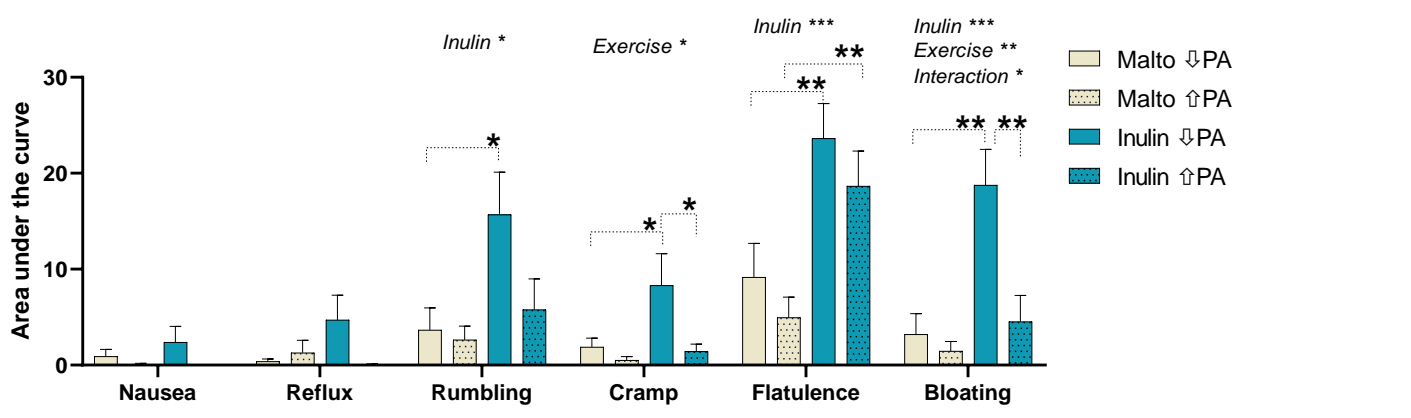**Additional file: Figure S1**

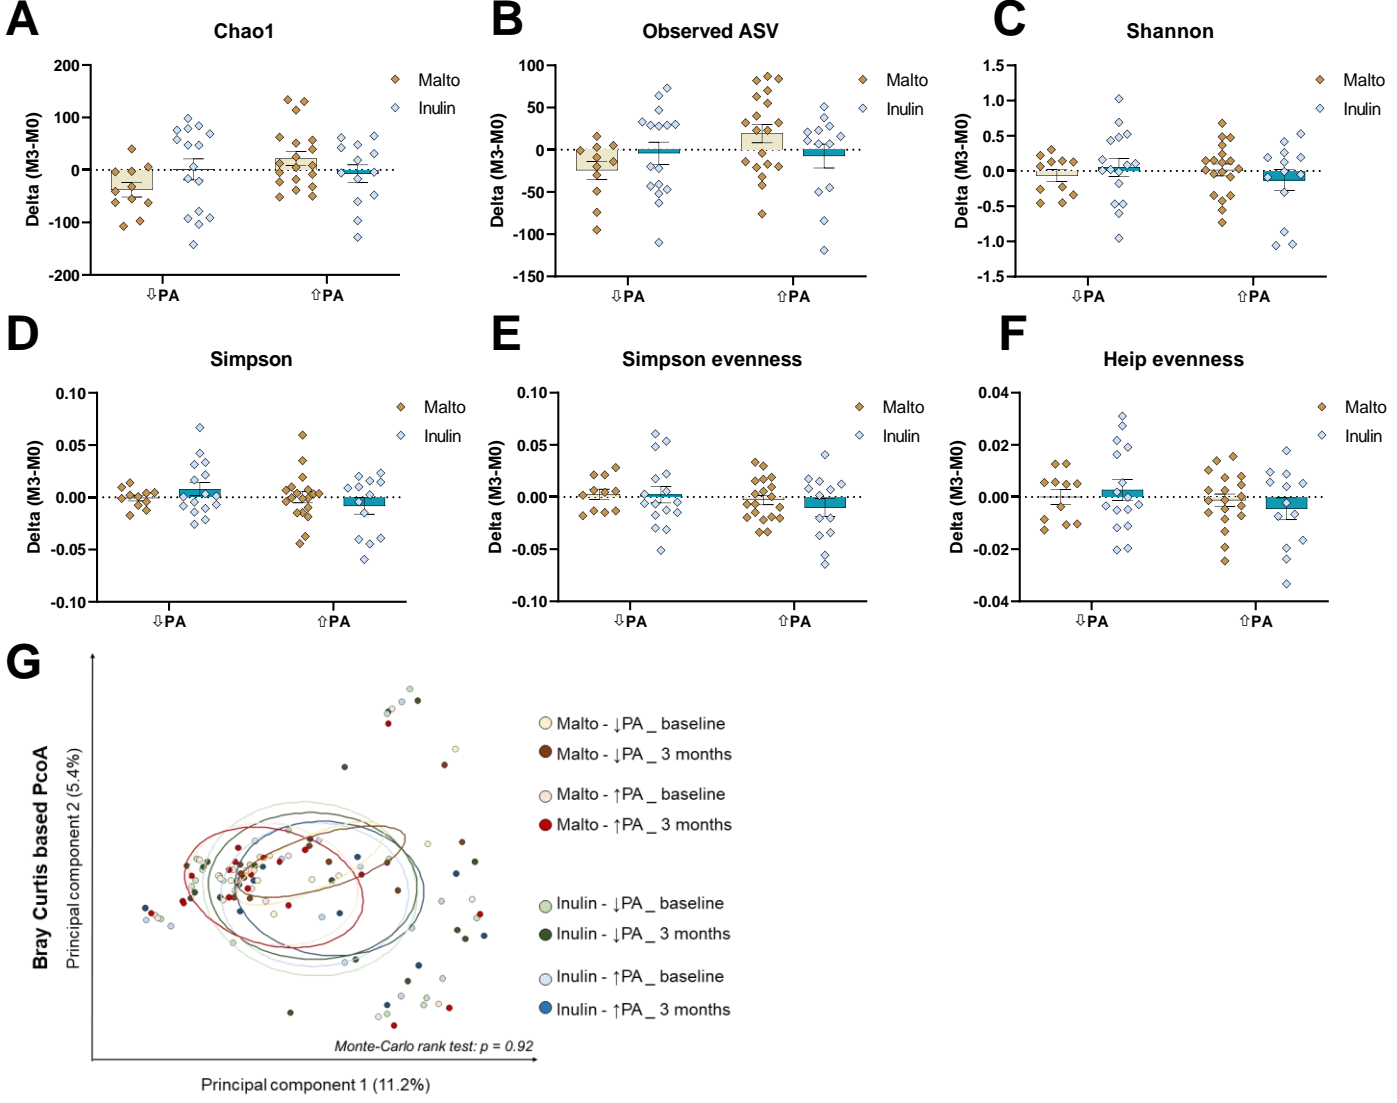

**Additional file: Figure S2**

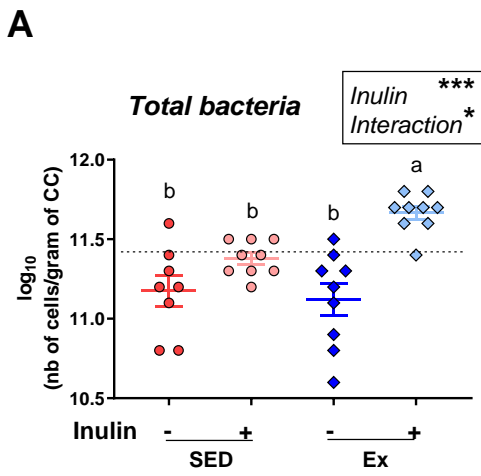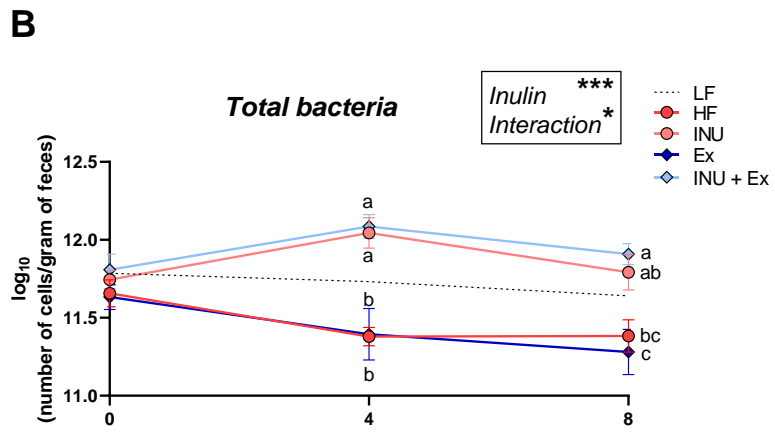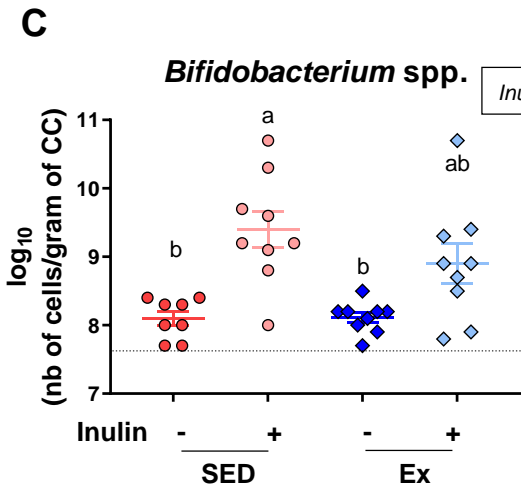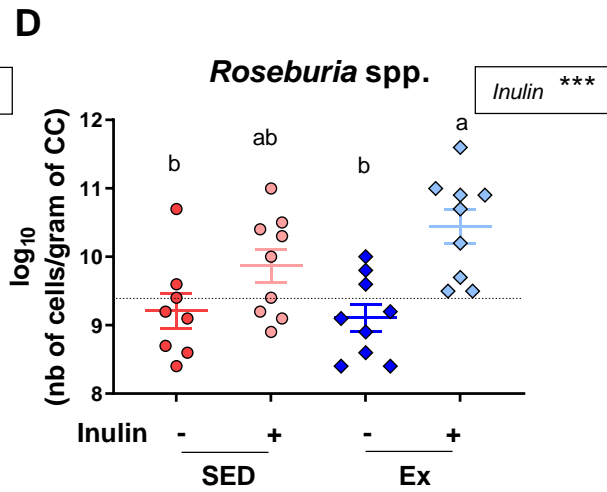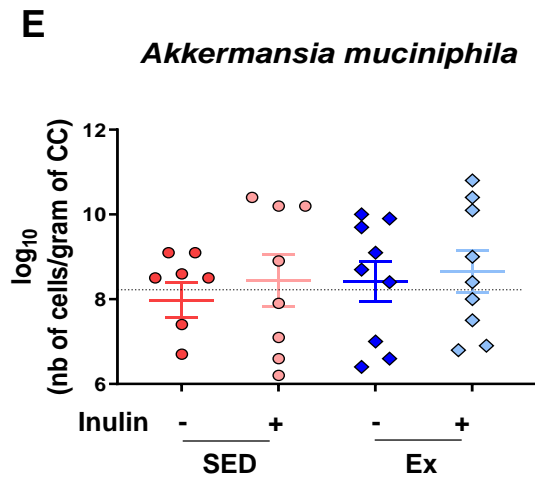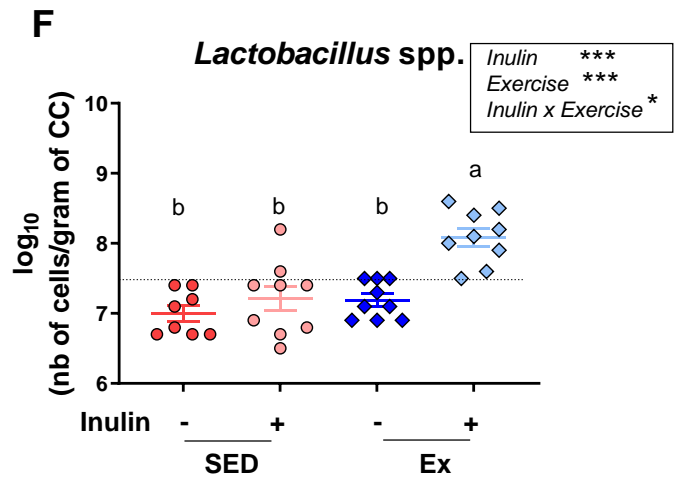

Additional file: Figure S3

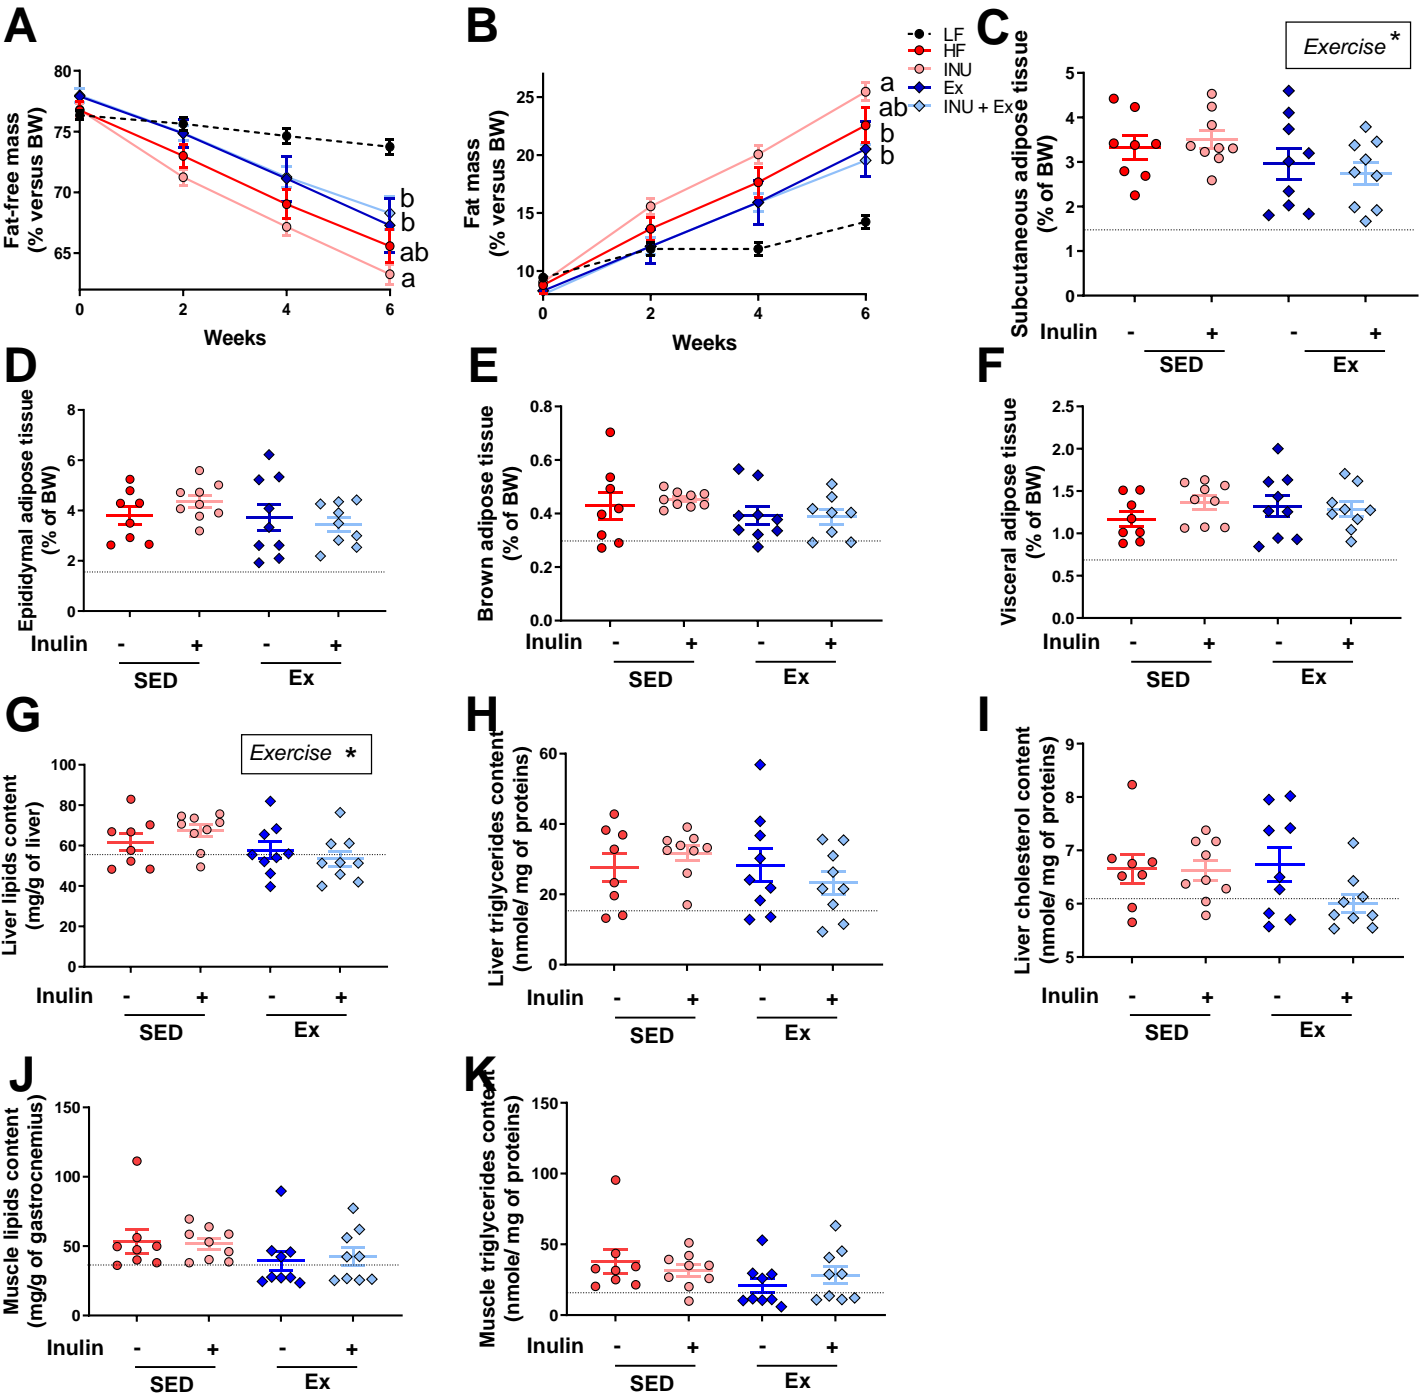

Additional file: Figure S4

**A****Hepatic gene expression**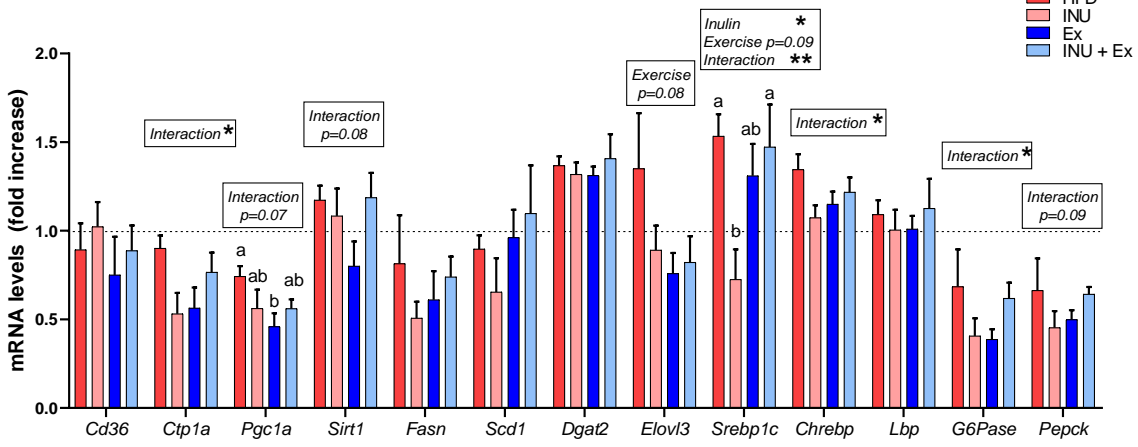**B****Muscle gene expression**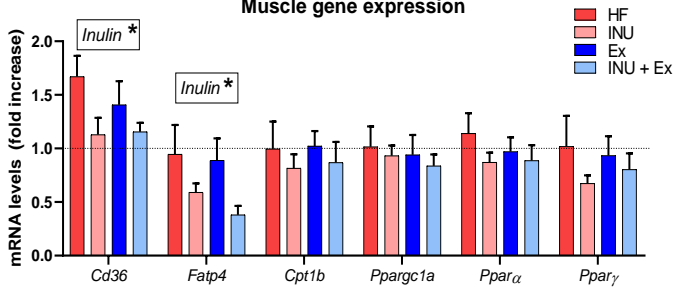**Additional file: Figure S5**
