# Supplementary material for: Physical activity enhances the improvement of body mass index and metabolism by inulin: a multicenter randomized placebo-controlled trial performed in obese individuals
Source: PubMed Central journal article supplement (PMC8966292; doi:10.1186/s12916-022-02299-z), 2022-03-30

**A/Western blot: GLUT4 antibody**

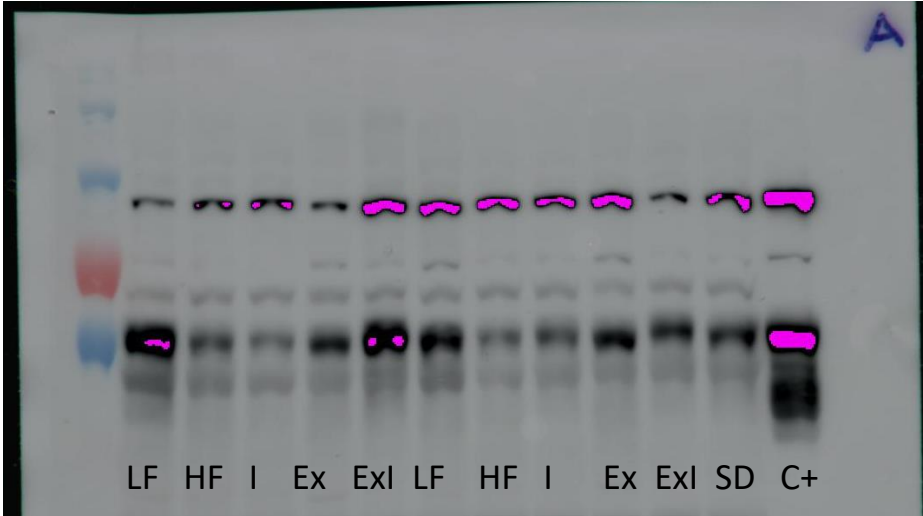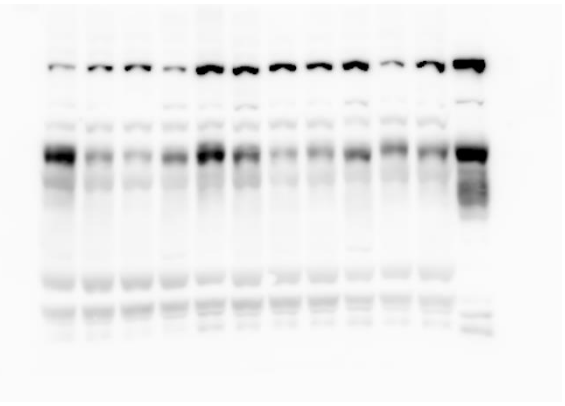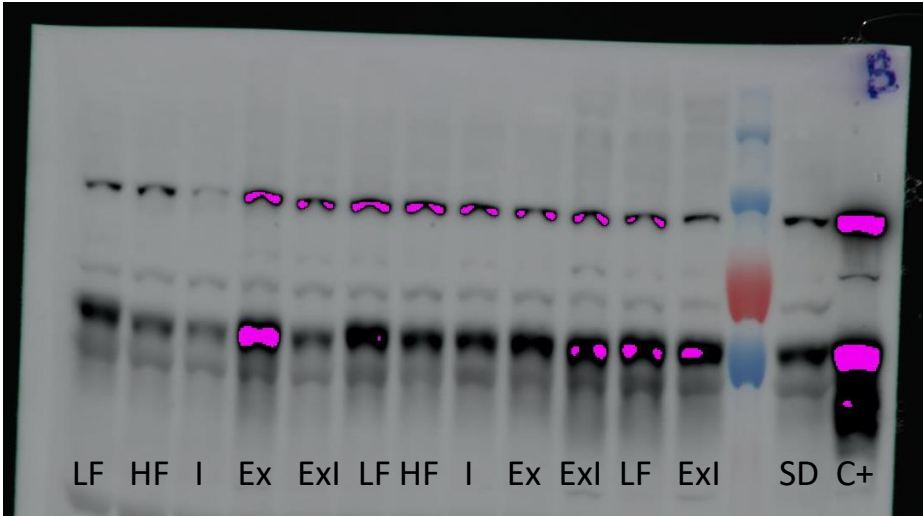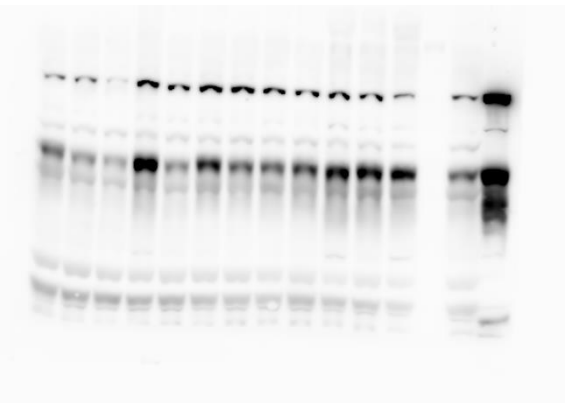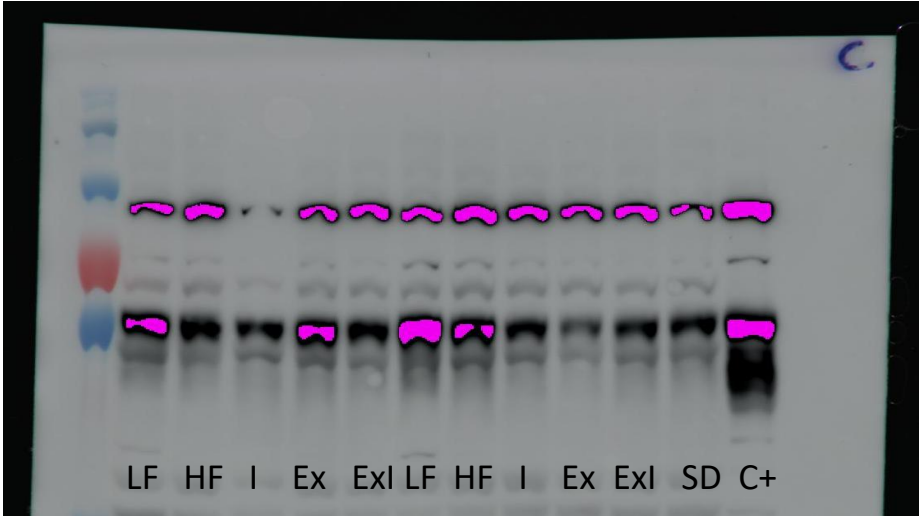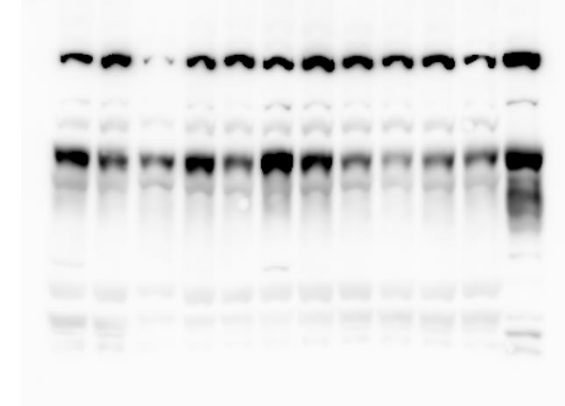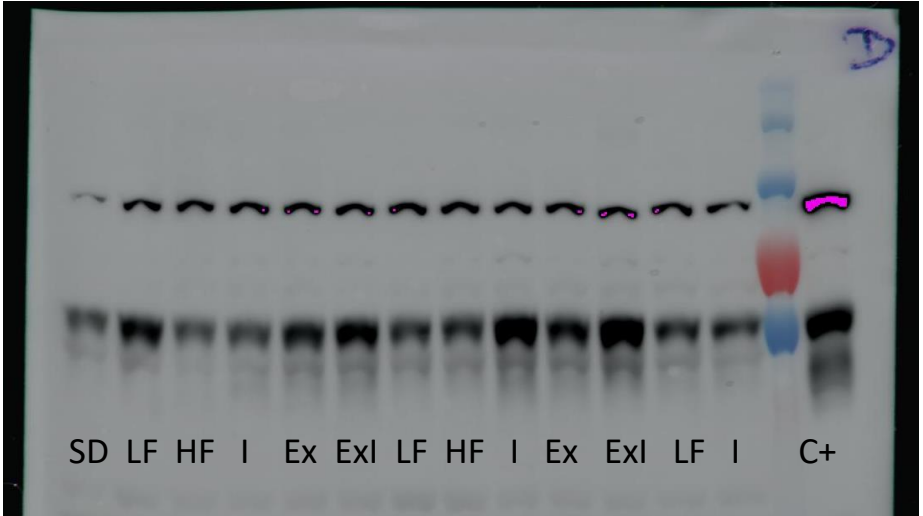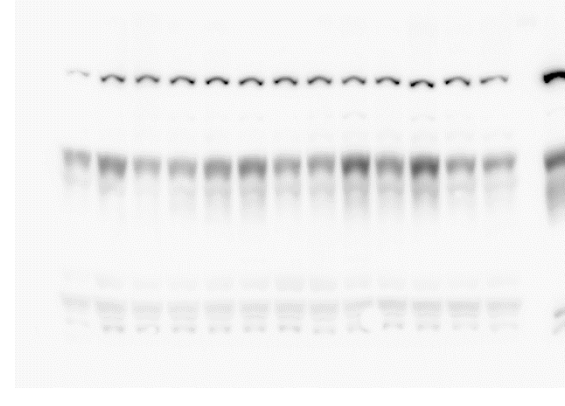

**B/ Staining with Ponceau S solution**

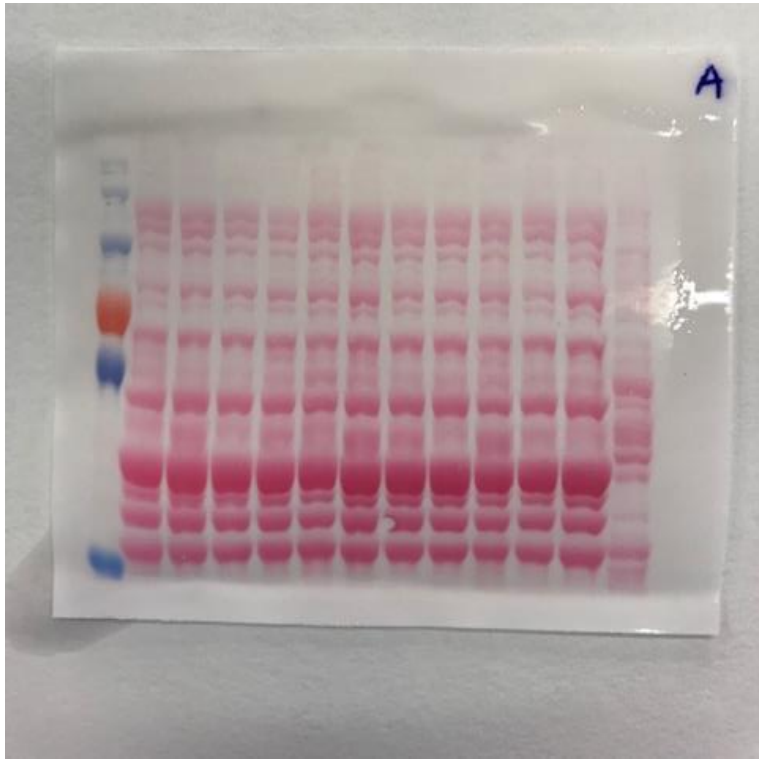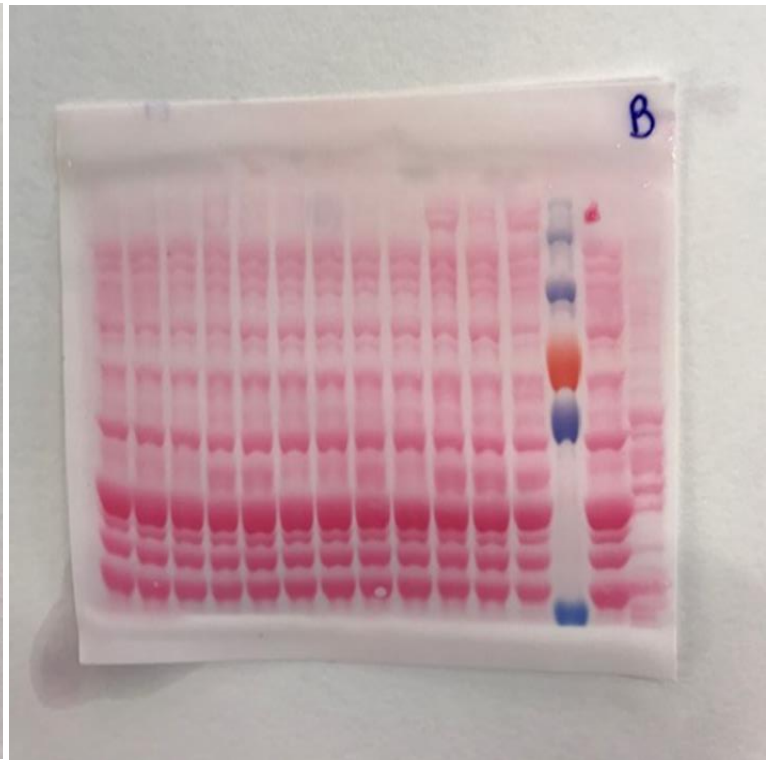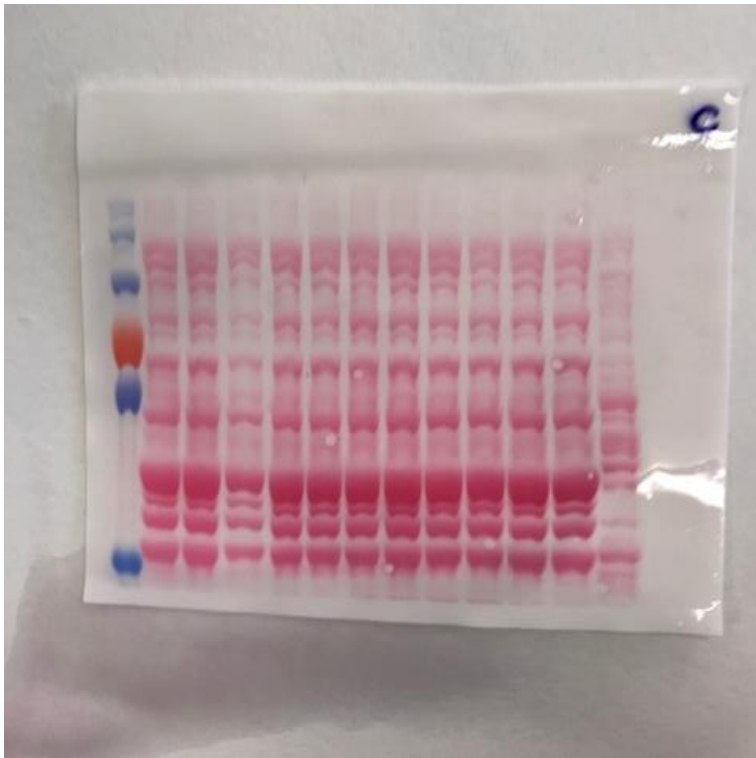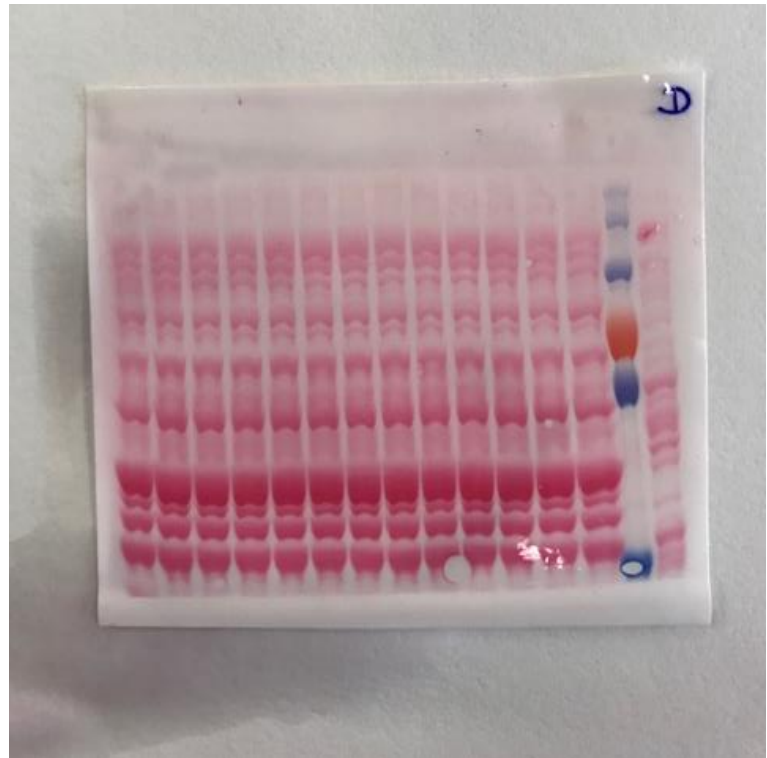

Supplement: 12916_2022_2299_MOESM3_ESM.pdf [file 12916_2022_2299_MOESM3_ESM.pdf]
