# Supplementary material for: Physical activity enhances the improvement of body mass index and metabolism by inulin: a multicenter randomized placebo-controlled trial performed in obese individuals
Source: Springer Nature journal article supplement (doi:10.1186/s12916-022-02299-z), 2022-03-30

Flow diagram (adapted from CONSORT 2010 flow diagram)

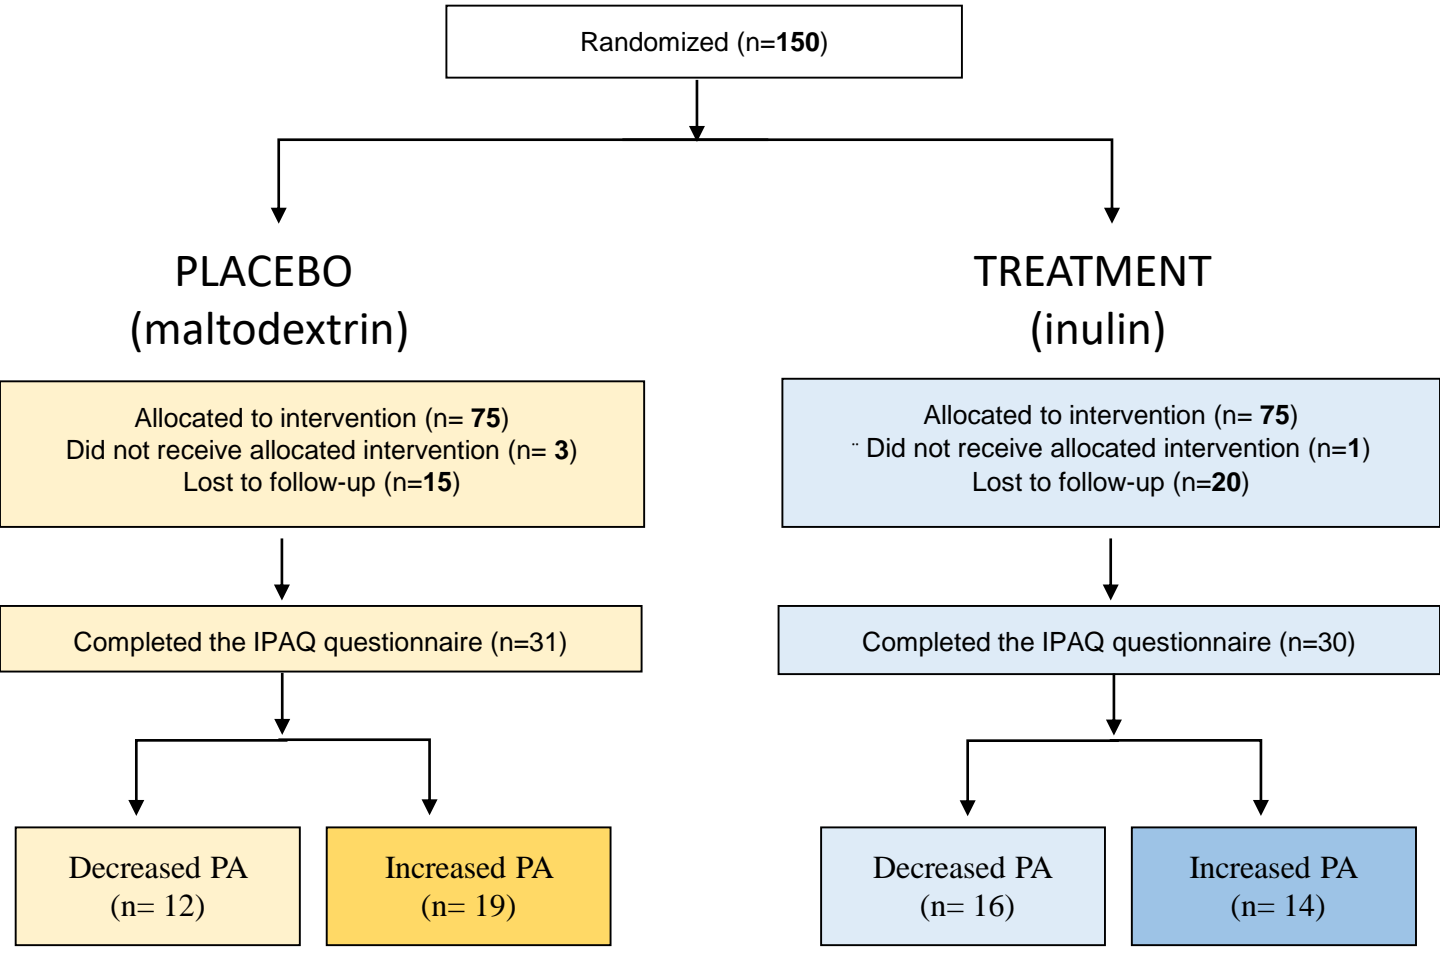

Supplement: MOESM7 [file 20268680]
